# Supplementary material for: The apicoplast link to fever-survival and artemisinin-resistance in the malaria parasite
Source: PubMed Central journal article supplement (PMC8316339; doi:10.1038/s41467-021-24814-1), 2021-07-27
Supplement: 41467_2021_24814_MOESM1_ESM.pdf [file 41467_2021_24814_MOESM1_ESM.pdf]

**The apicoplast link to fever-survival and artemisinin-resistance in the malaria parasite**

Zhang M, Wang C, Oberstaller J et al.

**SUPPLEMENTARY INFORMATION**

**Supplementary Figure 1.**  
**Schematic overview of pooled phenotypic screening pipeline.**

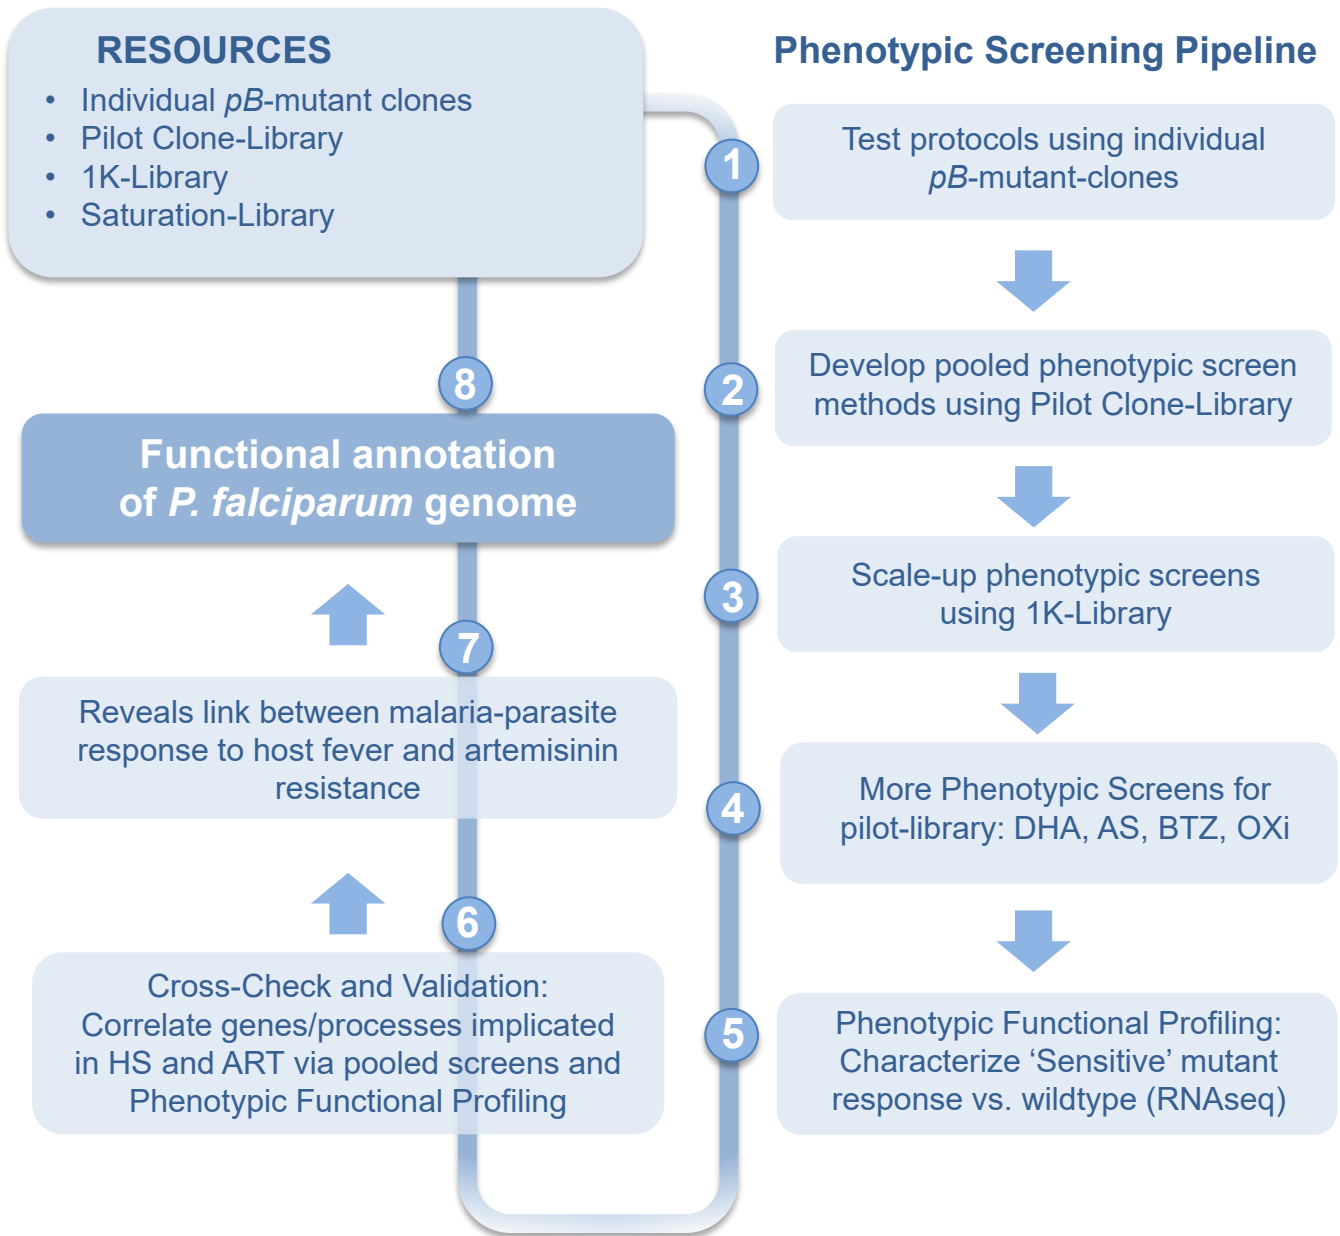

**Supplementary Figure 1. Schematic overview of the phenotypic screening pipeline.** *pB*-mutant library resources from small (individual, well-characterized mutant-clones) to large (the 1K-Library, comprised of pools randomly selected from the Saturation-Library) were used to design carefully validated pooled screens at increasingly large scale. 1) to test the protocols using individual *pB*-mutant clones; 2) to develop pooled phenotypic screen method using pilot-library screen; 3) then we scale-up phenotypic screen using 1K-library; 4) parallel phenotype screens using pilot-library; 5) Transcriptional profiling via RNAseq compare the parasite response to heat shock between the wildtype and HS-sensitive mutants. High correlation between mutant-phenotypes in HS-screens and ART-screens indicated mechanistic overlap in response to both stressors. Iterative rounds of pooled-screening for various phenotypes over time enables higher-throughput functional-annotation of the *P. falciparum* genome.

**Supplementary Figure 2.**  
**Extended screening data against the pilot-library and summary.**

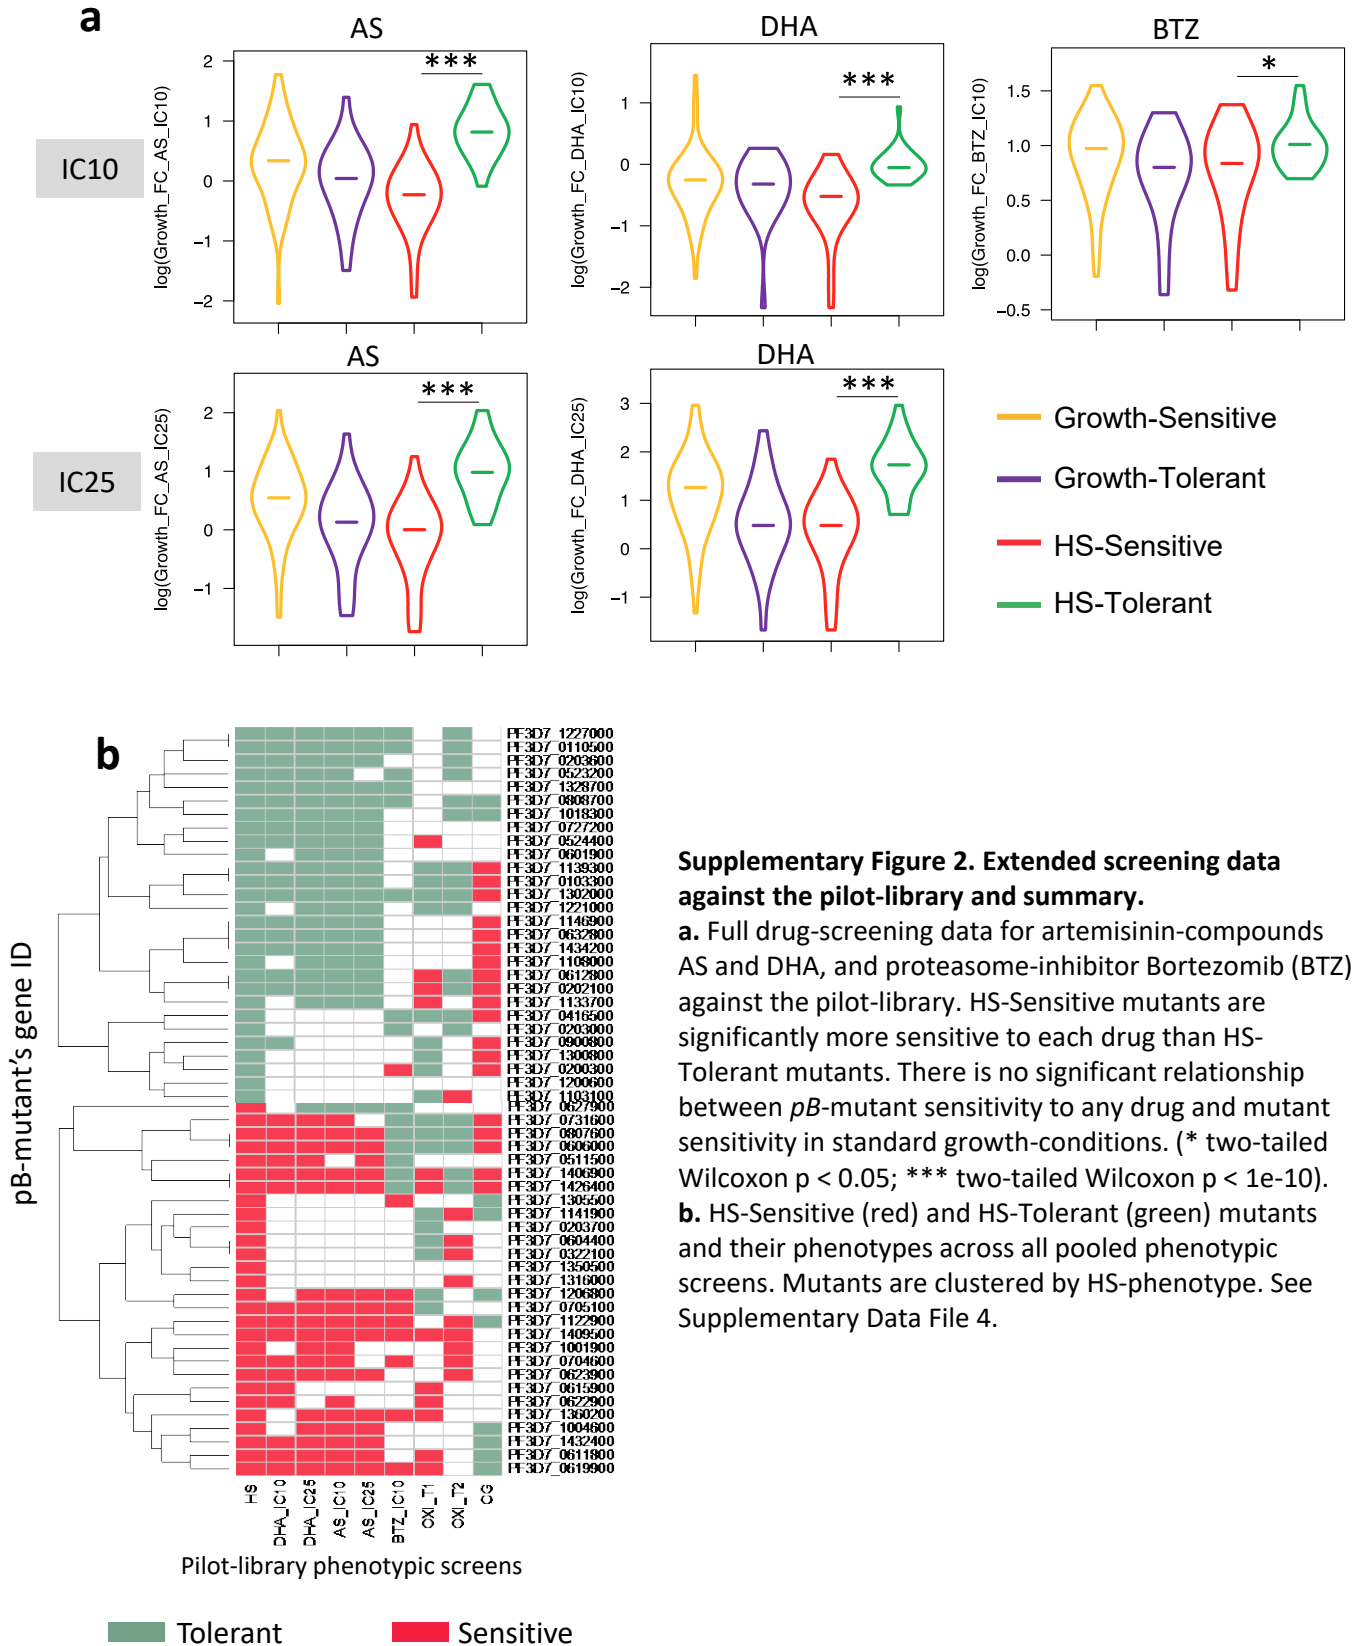

### Supplementary Figure 3.

**Mutants in members of the DV proteome, targets of ART alkylation, and putative interacting partners of K13 tend to be sensitive to HS.**

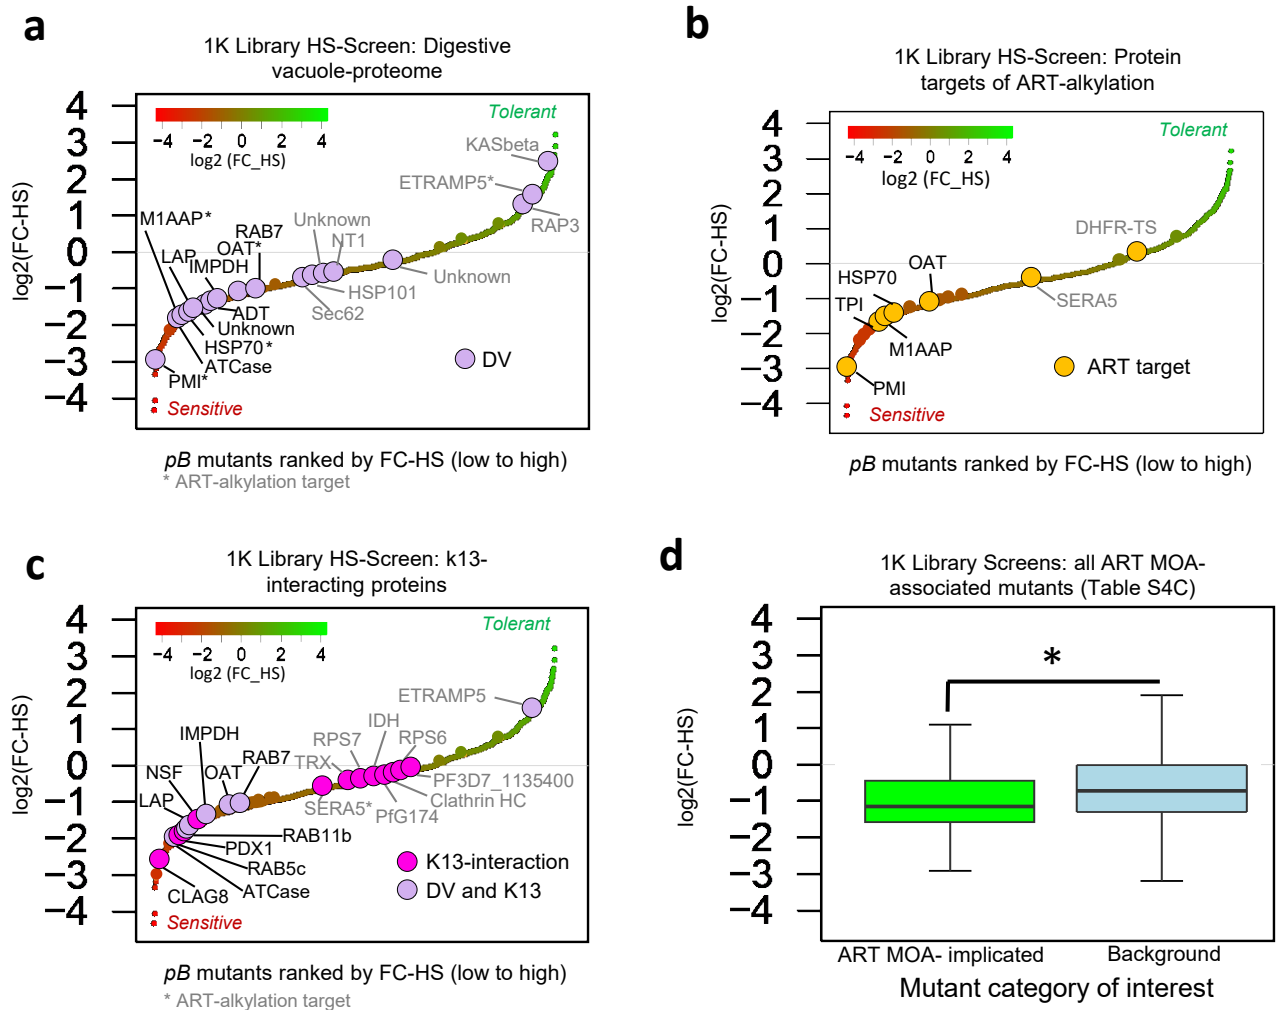

**Supplementary Figure 3. Mutants in members of the DV proteome, targets of ART alkylation, and putative interacting partners of K13 tend to be sensitive to HS.**

- 1k HS-Screen mutants are ordered by FC-HS from HS-Sensitive to HS-Tolerant. Mutants in digestive vacuole-associated proteins as previously defined<sup>1</sup> are indicated in lavender dots. Gene-symbols for mutants with HS-sensitivity are labeled with black text (10 of 18 genes). Gene-symbols for HS-Neutral and HS-Tolerant mutants are labeled with grey text.
- All mutants in ART alkylation-targets as previously defined<sup>2</sup> included in the 1K HS-Screen.
- HS-screen phenotypes of mutants in putative K13-interacting proteins as previously defined<sup>3</sup>.
- Mutants in ART MOA-implicated processes are more sensitive to heat stress (but not normal growth conditions) than background. (n = 58 mutants in 47 unique genes total, vs. all mutants of the 1k library). \* two-tailed Wilcoxon p-value = 0.03. Boxplots are drawn to present interquartile range of values (IQR). Lower bound of each box = 1<sup>st</sup> quartile, middle line = median, upper bound = 3<sup>rd</sup> quartile, and whiskers extend to at most 1.5x IQR. Source data are provided as a Source Data file.

## Supplementary Figure 4.

Key processes are regulated in response to heat shock and artemisinin.

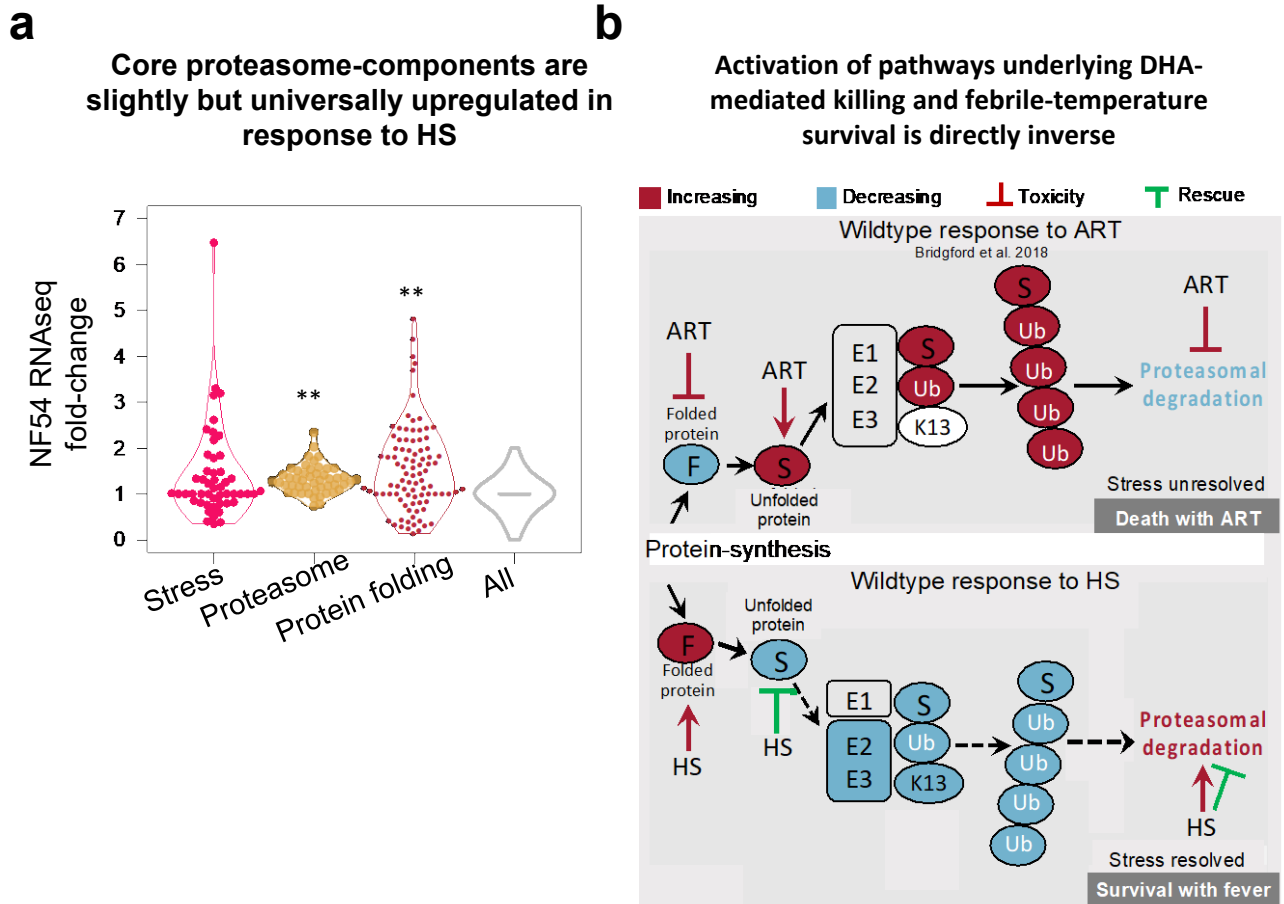

**Supplementary Figure 4. Key processes are regulated in response to heat shock and artemisinin. a.**

**Core proteasome-components are slightly but universally upregulated in response to HS** as compared to other aggregately upregulated processes which have more heterogenous expression. Fold-change for most individual proteasome-components did not meet our threshold to be designated “upregulated”.

\*\* two-tailed Wilcoxon p-value < 1e-5.

**b. Activation of pathways underlying DHA-mediated killing and febrile-temperature survival is directly inverse. Top.**

Model of DHA-mediated killing in *P. falciparum* adapted from <sup>4</sup>. Artemisinin (ART) damages and unfolds proteins, prevents folding of newly synthesized proteins, and inhibits the proteasome while at the same time activating E1/E2/E3 ubiquitin-machinery. Accumulation of toxic polyubiquitinated protein-substrates (S) overwhelms the cell and leads to death. **Bottom.** Model of parasite fever-response. Heat-stress causes globally damaged protein. The parasite increases the UPR as it inhibits E2/E3 ubiquitination to prevent accumulation of toxic, polyubiquitinated (Ub) protein-aggregates, while at the same time increasing its capacity for proteasome-mediated degradation—ultimately enabling the parasite to resolve heat-shock-instigated stress and survive febrile-temperatures.

## Supplementary Figure 5.

### Qlseq data-correlations within and between pilot-library screens.

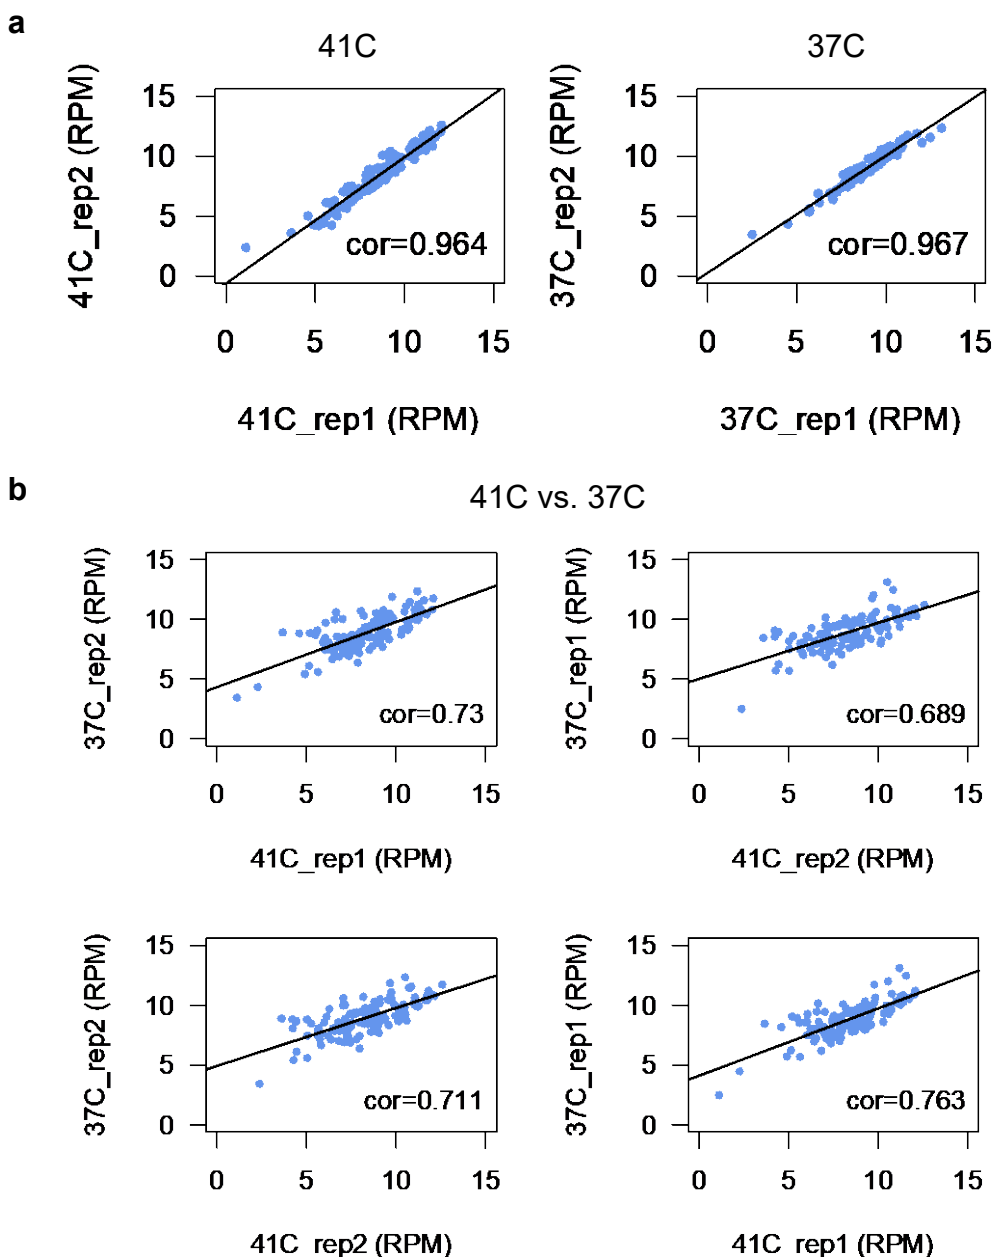

### Supplementary Figure 5. Qlseq data-correlations within and between pilot-library screens.

**a.** Pearson correlations between 5' and 3' Qlseq data for 37°C\_ideal-growth screen and 41°C\_heat-shock screen indicate highly reproducible analyses across technical and biological replicates in both screens (Figure 1b).

**b.** Correlations within and between 37°C\_ideal growth screen and 41°C\_heat-shock screen Qlseq data. The samples were collected in HS-Screens of the pilot-library include two bio-reps and three technical-reps (Figure 1a; Methods, HS-Screen). High correlations of two bio-reps within both HS-screens and Growth-screens (HS-Screen,  $R=0.94$ ; Growth-Screen,  $R=0.89$ ) indicate the pilot-library screens are highly reproducible, and weak correlation between HS-screens and Growth-screens ( $R \sim 0.42$ ) suggests heat-shock exposure-conditions were sufficient to allow reproducible detection of mutants with specific selection response-phenotypes from pooled screening.

## Supplementary Figure 6.

### *pB*-mutant insertion-site distribution in the pilot library and the 1K library.

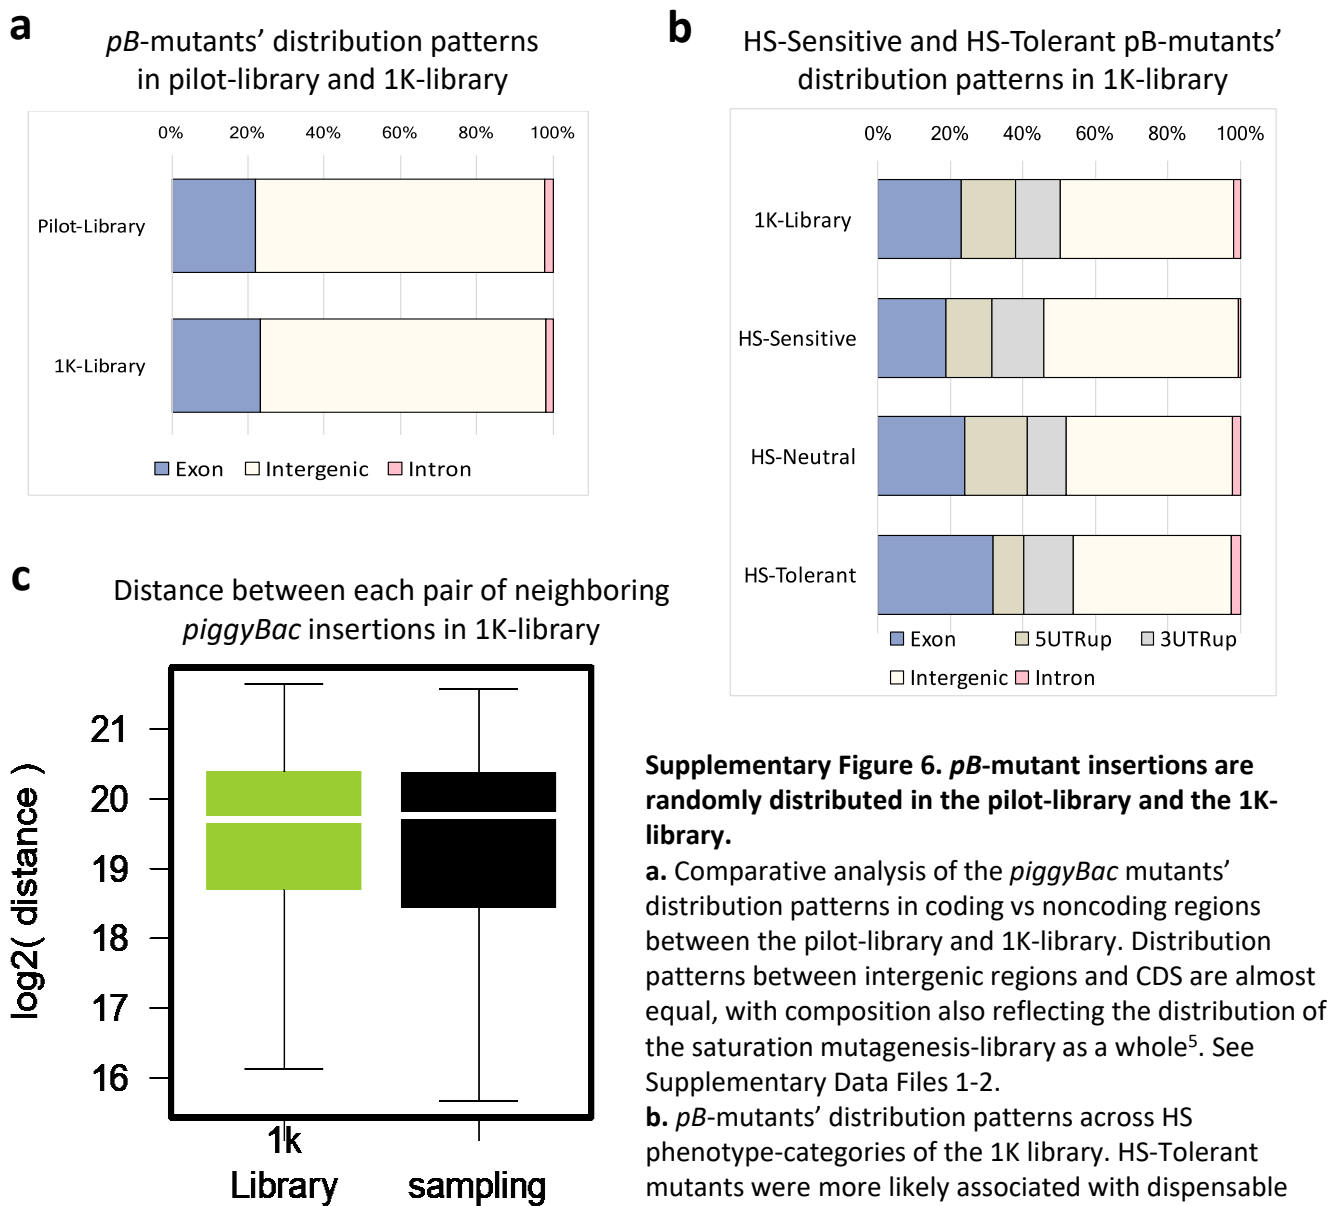

**Supplementary Figure 6. *pB*-mutant insertions are randomly distributed in the pilot-library and the 1K-library.**

**a.** Comparative analysis of the *piggyBac* mutants' distribution patterns in coding vs noncoding regions between the pilot-library and 1K-library. Distribution patterns between intergenic regions and CDS are almost equal, with composition also reflecting the distribution of the saturation mutagenesis-library as a whole<sup>5</sup>. See Supplementary Data Files 1-2.

**b.** *pB*-mutants' distribution patterns across HS phenotype-categories of the 1K library. HS-Tolerant mutants were more likely associated with dispensable genes (genes with exonic insertions) than HS-Sensitive genes.

**c.** Distances between insertions of the 1K library are random. There is no significant difference in distance between each pair of neighboring *piggyBac* insertions of the 1K library and coordinates chosen by random sampling ( $p$ -value = 0.787, two-tailed Mann-Whitney U test). Sampling was repeated 100x with sites randomly selected across all chromosomes. Boxplots are drawn to present interquartile range of values (IQR). Lower bound of each box = 1<sup>st</sup> quartile, middle line = median, upper bound = 3<sup>rd</sup> quartile, and whiskers extend to at most 1.5x IQR.

**Supplementary Figure 7.**  
**Reproducibility in the 1K-library HS-Screen.**

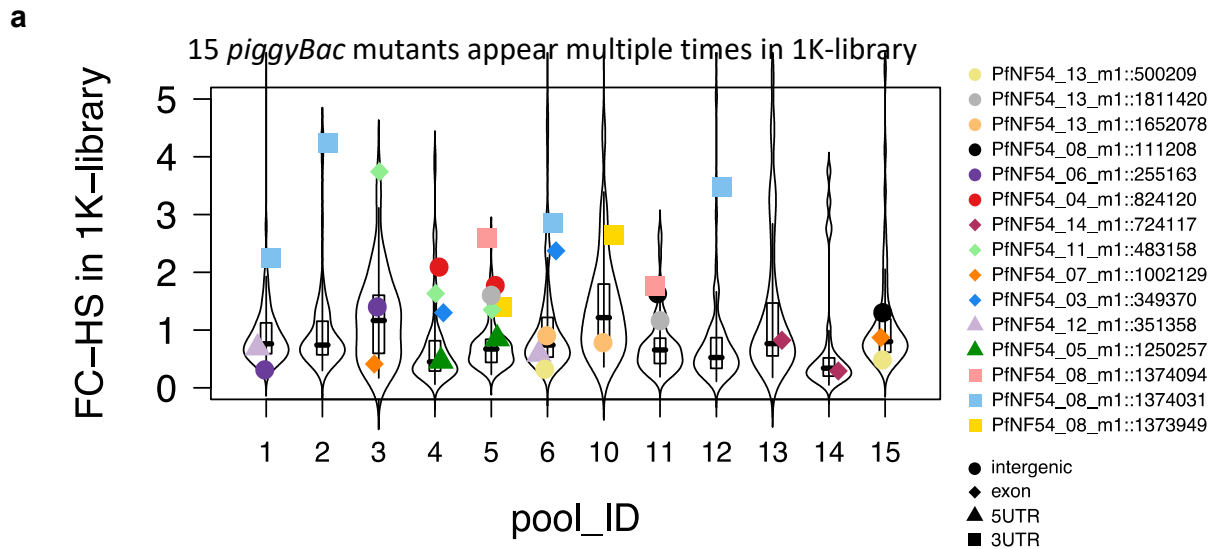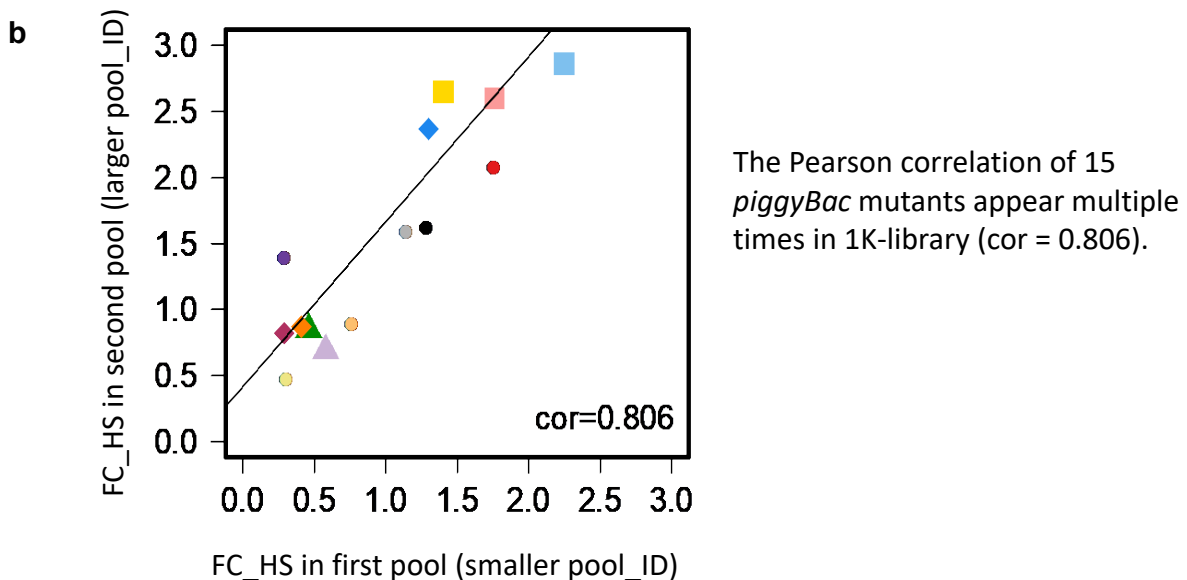

**Supplementary Figure 7. Reproducibility of the 1K-library HS-Screen.**

**a.** The 1K-library consists of randomly selected, uncloned large mixed-population pools (LMPP) of ~100 unique mutants per pool. Fifteen insertion-sites are duplicated in mutants of at least one other pool. Each of the 12 LMPP comprising the 1K-library (LMPP\_1-6; LMPP\_10-15) are indicated on the x-axis with violin plots showing the distribution of mutant fold change in response to heat shock (FC-HS) within that pool. FC-HS of the fifteen insertion-sites duplicated in at least one other pool are plotted in color, with insertion location-category indicated by shape. Boxplots are drawn to present interquartile range of values (IQR). Lower bound of each box = 1<sup>st</sup> quartile, middle line = median, upper bound = 3<sup>rd</sup> quartile, and whiskers extend to at most 1.5x IQR.

**b.** FC-HS of duplicated insertional mutants are highly correlated across pools (Pearson correlation = 0.806), indicating high reproducibility of mutant phenotypes independent of mutant pool-composition. Insertions are represented as in plot A.



## Supplementary Figure 8. Reproducibility within and between the pilot-library and 1K-library HS-Screens.

a

| PB Pool ID         | PB Mutant ID   | Insertion Site        | Distance to gene | Type of Insertion | GeneID        | Gene Function                               | Fold Change (41C/37C) |
|--------------------|----------------|-----------------------|------------------|-------------------|---------------|---------------------------------------------|-----------------------|
| Pilot-library      | PB4_DHC_11     | PfNF54_11_m1::879695  | 0                | exon              | PF3D7_1122900 | dynein heavy chain, putative                | 0.21                  |
| 1K-library-Pool_14 | 14-016_DHC_12B | PfNF54_12_m1::135712  | 0                | exon              | PF3D7_1202300 | dynein heavy chain, putative                | 0.05                  |
| 1K-library-Pool_4  | 4-054_DHC_10   | PfNF54_10_m1::980010  | 0                | exon              | PF3D7_1023100 | dynein heavy chain, putative                | 0.28                  |
| 1K-library-Pool_14 | 14-015_DHC_12A | PfNF54_12_m1::121344  | 0                | exon              | PF3D7_1202300 | dynein heavy chain, putative                | 0.32                  |
| Pilot-library      | PB-54_FIKK9.3  | PfNF54_09_m1::99320   | 0                | exon              | PF3D7_0902200 | FIKK family (FIKK9.3)                       | 0.52                  |
| 1K-library-Pool_4  | 4-043_FIKK9.1  | PfNF54_09_m1::92390   | 1095             | intergenic        | PF3D7_0902000 | FIKK family (FIKK9.1)                       | 0.23                  |
| 1K-library-Pool_13 | 13-028_FIKK9.2 | PfNF54_09_m1::93353   | -477             | 3UTRup            | PF3D7_0902100 | FIKK family (FIKK9.2)                       | 0.41                  |
| 1K-library-Pool_12 | 12-040_ETRAMP  | PfNF54_10_m1::82063   | 324              | 5UTRup            | PF3D7_1001500 | early transcribed membrane protein 10.1     | 0.310                 |
| 1K-library-Pool_1  | 1-055_ETRAMP   | PfNF54_10_m1::82163   | 424              | 5UTRup            | PF3D7_1001500 | early transcribed membrane protein 10.1     | 0.470                 |
| 1K-library-Pool_4  | 4-048_HAD1     | PfNF54_10_m1::1339529 | -238             | 5UTRup            | PF3D7_1033400 | haloacid dehalogenase-like hydrolase (HAD1) | 0.320                 |
| 1K-library-Pool_12 | 12-037_HAD1    | PfNF54_10_m1::1340834 | 201              | 3UTRup            | PF3D7_1033400 | haloacid dehalogenase-like hydrolase (HAD1) | 0.410                 |

Phenotypes of mutants in genes represented in both the pilot library and 1K-library (n = 16 genes) are highly correlated

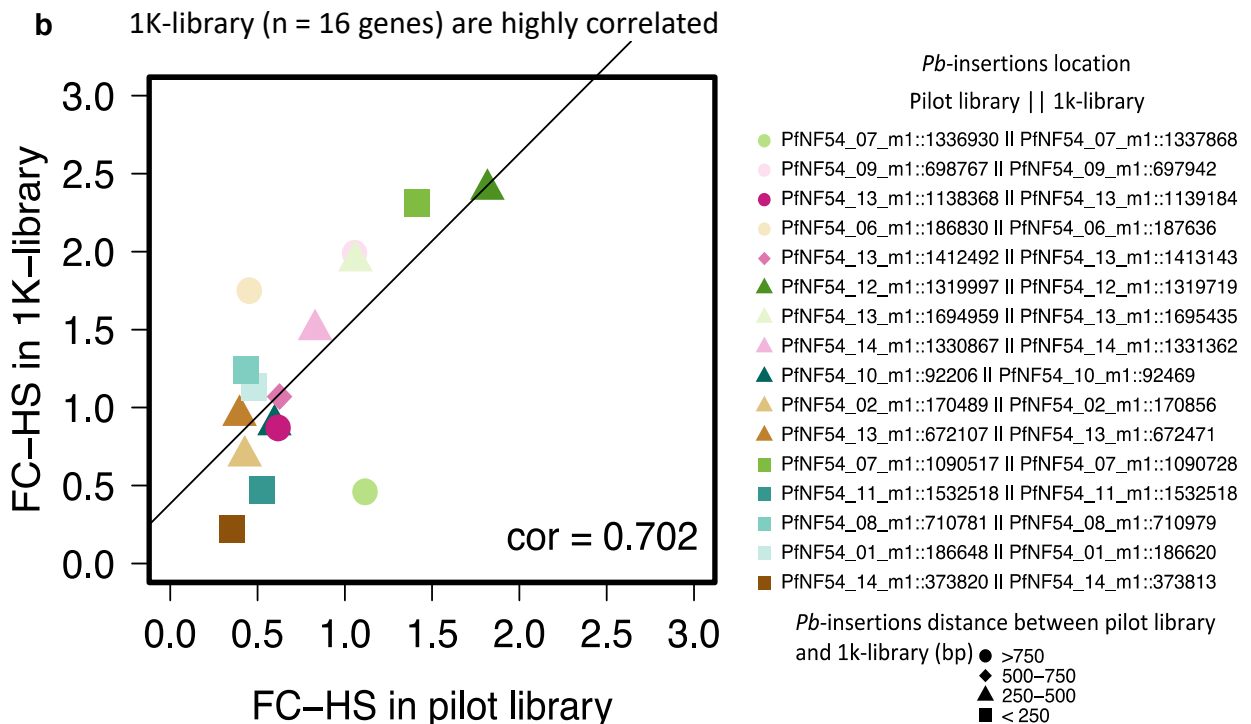

### Supplementary Figure 8. Reproducibility within and between the pilot-library and 1K-library HS-Screens.

a. Within- and between-library consistency indicates the robusticity of HS phenotype-assignments in pooled screening. Dynein heavy chain (DHC) gene-family mutants (two in DHA\_12, PF3D7\_1202300; one mutant of DHA\_10, PF3D7\_1023100) were consistently identified as HS-Sensitive in the pilot-library and across multiple pools of the 1K-library, as were representatives of FIKK-family genes.

b. Heat shock phenotypes are reproducible between the pilot library and the 1K-library. FC-HS of insertional mutants in genes represented in both the pilot library and the 1K-library (n = 16 genes; colored points) are highly correlated (Pearson correlation = 0.702). Insertion coordinate in the pilot library is indicated on the left of the '|', while insertion coordinate of the mutant in the same gene in the 1K-library is to the right. Distance between the pilot-library insertion and the 1K-library insertion is indicated by shape (maximum distance = 1kb).

**Supplementary Figure 9.**  
**Distributions of  $PFS_{HS}$  for mutant heat-shock phenotype classifications in the 1K-Library screen.**

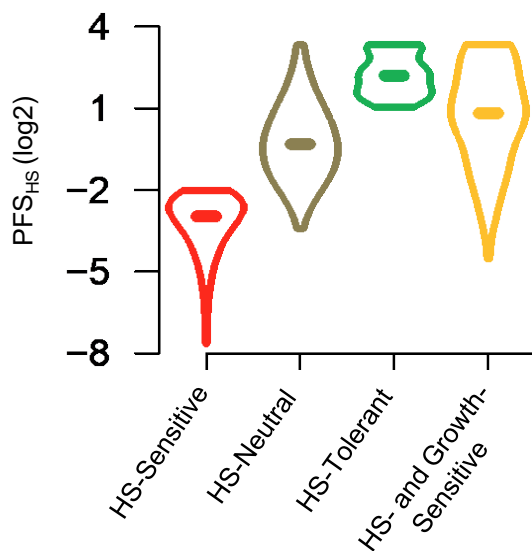

**Supplementary Figure 9. Distributions of  $PFS_{HS}$  for mutant heat-shock phenotype classifications in the 1K-Library screen.** HS-Sensitive mutants (mutants displaying defective growth in response to heat shock but not in response to ideal growth conditions) are assigned the lowest  $PFS_{HS}$ , while HS-Tolerant mutations are assigned the highest  $PFS_{HS}$ . See Supplementary Data File 2 and Methods for  $PFS_{HS}$  calculation details.

## Supplementary Figure 10.

Qlseq data-correlations between biological replicates for pilot-library phenotypic screens: drugs and oxidative stress.

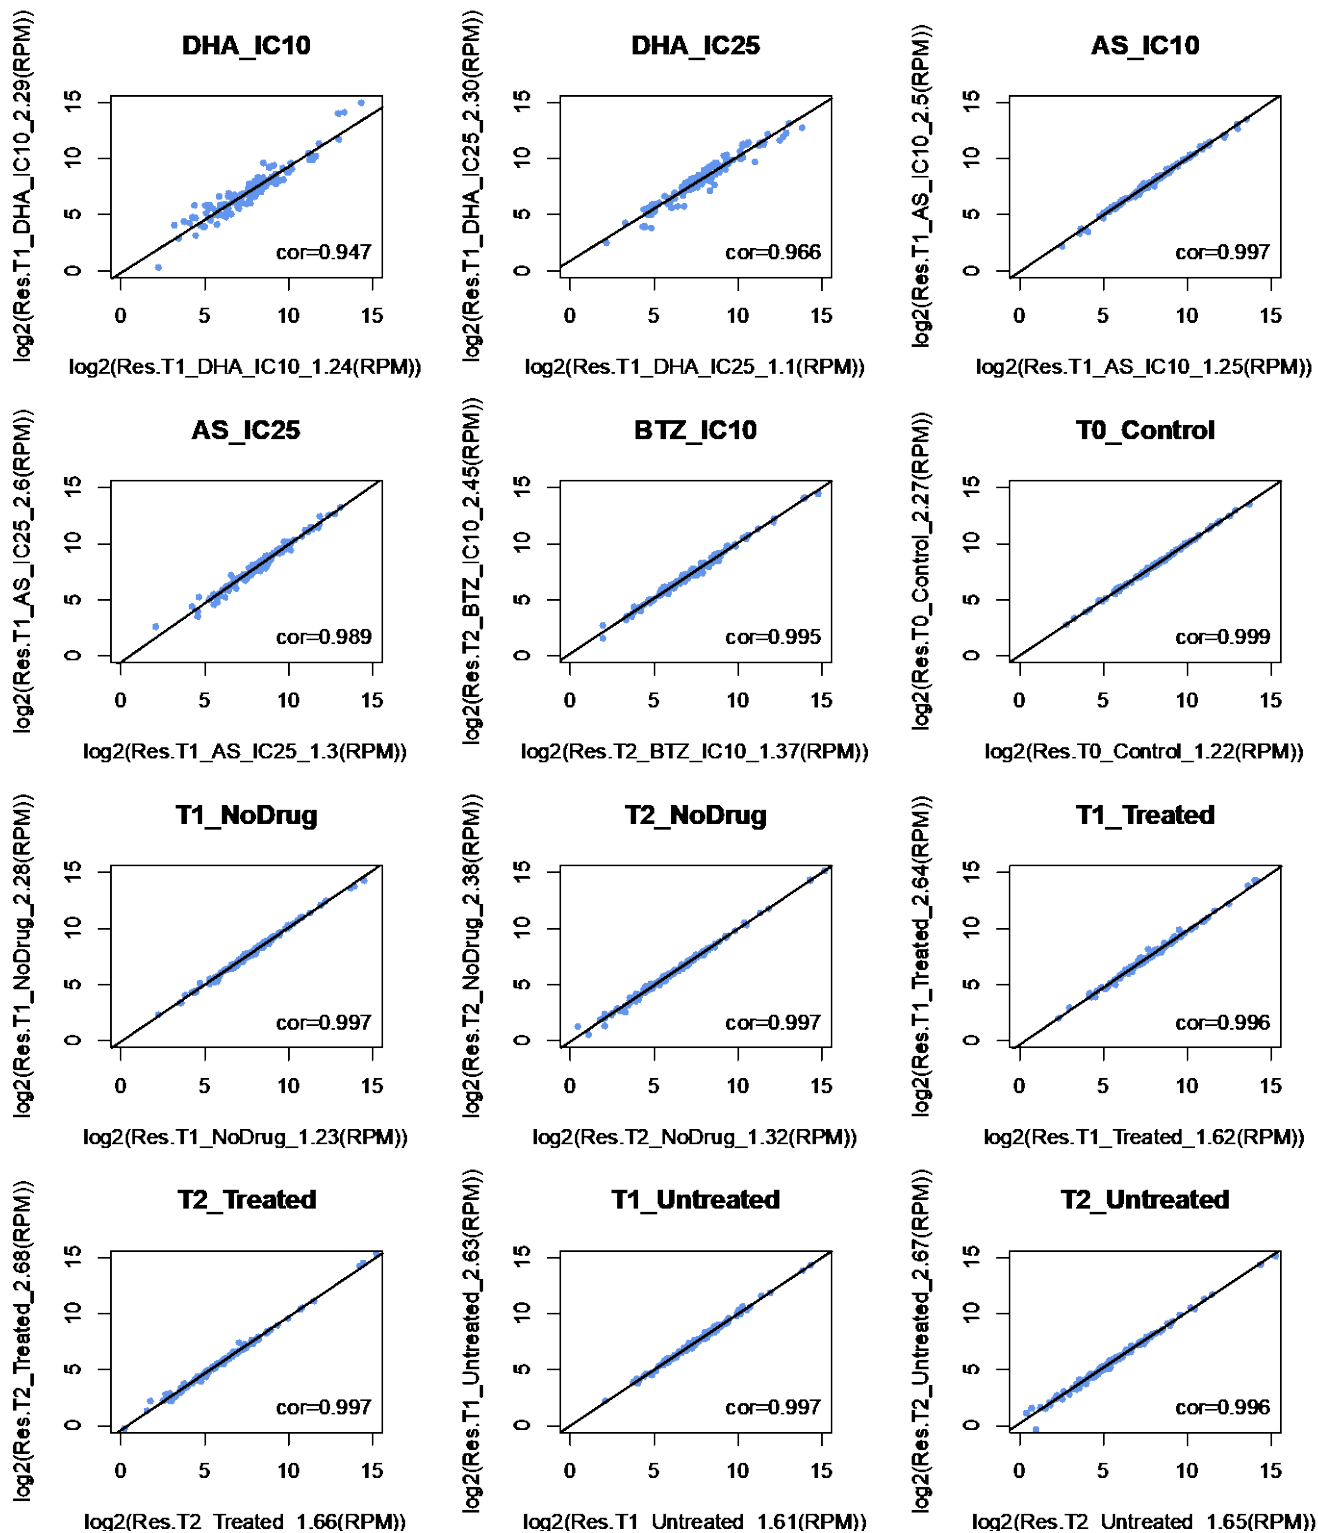

Supplementary Figure 10. Qlseq data-correlations between biological replicates for pilot-library phenotypic screens: drugs and oxidative stress. All pooled phenotypic screens of the pilot-library (AS, DHA, BTZ, oxidative stress, ideal growth) were performed in biological duplicate. Biological replicates were highly correlated, indicating highly reproducible analyses across all pilot-library phenotype screens.

## Supplementary Figure 11. Methods and validation for comparative RNAseq.

RNA sample collection for wildtype malaria-parasite NF54 vs. two HS-Sensitive *pB*-mutant clones in response to febrile temperatures

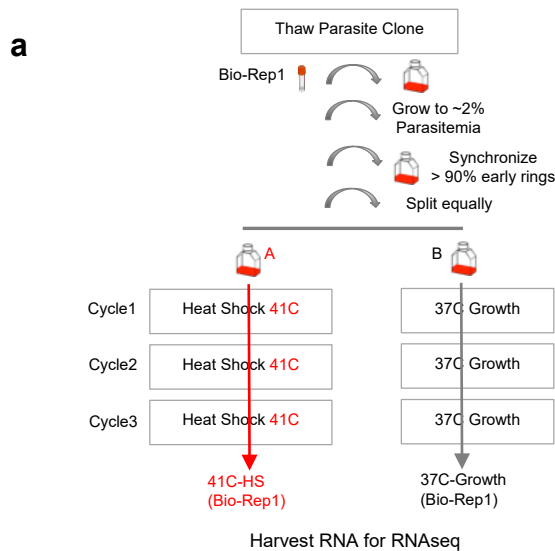

**b** Fold-change in HS vs. 37C-control

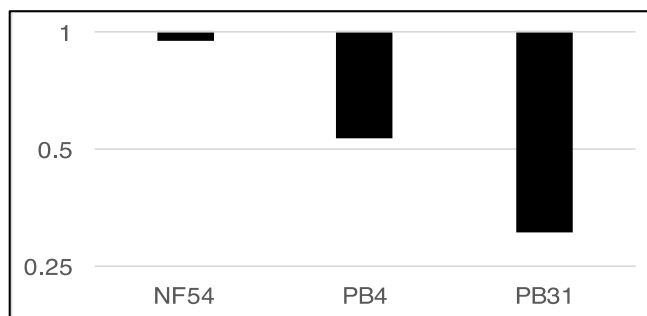

### Supplementary Figure 11. Methods and validation for comparative RNAseq.

**a.** RNA sample-collection methods for wildtype malaria-parasite NF54 vs. two HS-Sensitive *pB*-mutant clones  $\Delta DHC$  (PB4) and  $\Delta LRR5$  (PB31) in response to febrile temperatures. Assays were performed in biological duplicate.

**b.** Validation of HS-Sensitive mutant-clones during RNA-Seq Sample preparation. Both mutants grown individually had growth-defects in response to HS as compared to NF54.

## Supplementary Figure 12.

Complementary methods indicate genes driving the parasite heat-shock response.

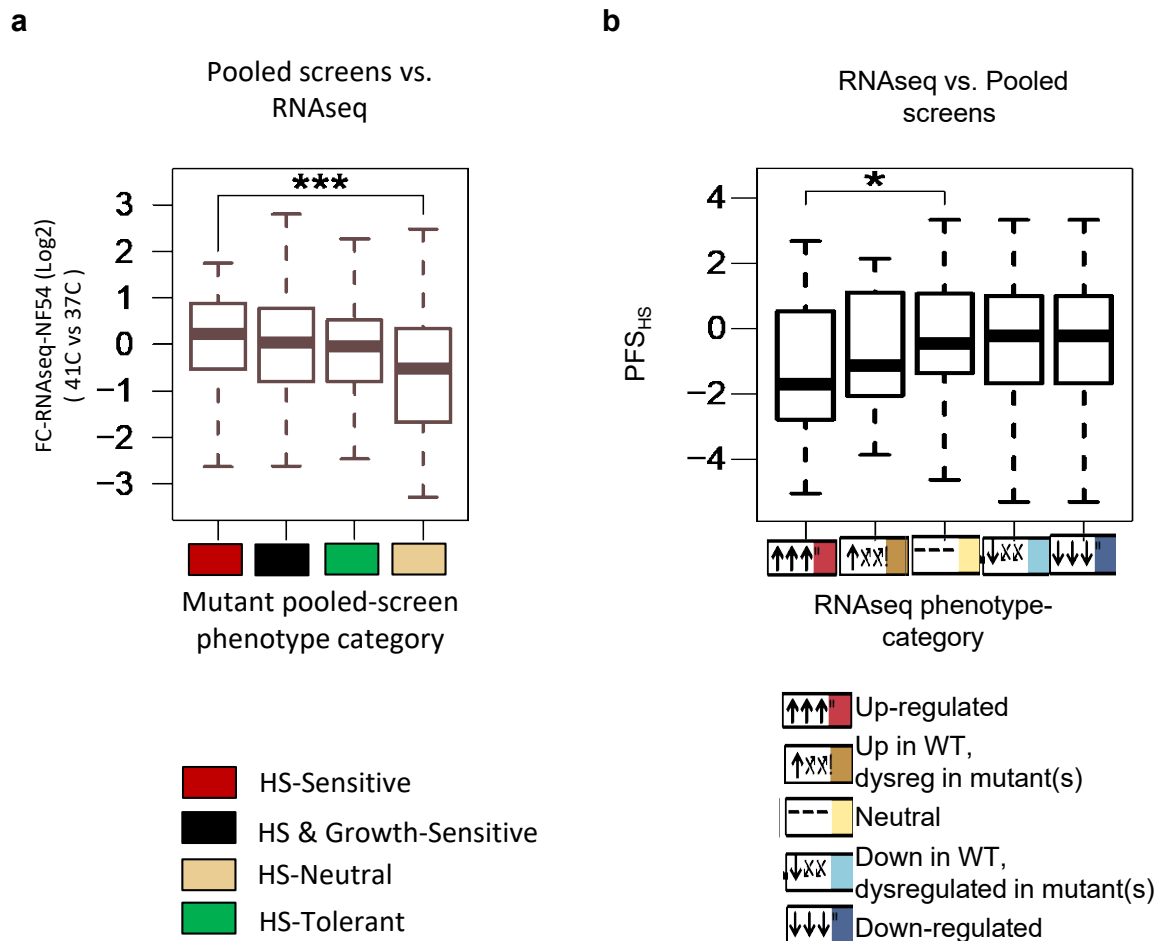

**Supplementary Figure 12. Complementary methods (pooled phenotypic screening, phenotypic transcriptional profiling of HS-Sensitive mutants vs. wildtype in response to heat stress) indicate genes driving the parasite heat-shock response.**

**a.** HS-Sensitive *pB* mutants tend to have mutations in genes that have significant changes in expression in response to heat-stress, while mutants that are neutral to or tolerant of heat-stress tend to have mutations in genes that are not regulated in response to heat-stress. (\* two-tailed Wilcoxon  $p < 0.05$ ; \*\*\* two-tailed Wilcoxon  $p < 1e-10$ ). Boxplots are drawn to present interquartile range of values (IQR). Lower bound of each box = 1<sup>st</sup> quartile, middle line = median, upper bound = 3<sup>rd</sup> quartile, and whiskers extend to at most 1.5x IQR. See Supplementary Data File 2.

**b.** *pB* mutants in genes normally up-regulated in response to heat-stress grow poorly in response to heat-stress (i.e., have significantly lower phenotypic fitness-scores) than mutants in genes that are neutral or down-regulated in response to heat-stress. (\* two-tailed Wilcoxon  $p < 0.05$ ; \*\*\* two-tailed Wilcoxon  $p < 1e-10$ ). Boxplots are drawn to present interquartile range of values (IQR). Lower bound of each box = 1<sup>st</sup> quartile, middle line = median, upper bound = 3<sup>rd</sup> quartile, and whiskers extend to at most 1.5x IQR. See Supplementary Data File 2.

**SUPPLEMENTARY TABLE LEGENDS**

**Supplementary Table 1. QIseq dataset accession numbers.**

**Supplementary Table 1. Raw Qiseq data accession numbers.**

| <b>Analysis provided in:</b> | <b>Qiseq Sample Name</b> | <b>Qiseq Sample ID</b> | <b>Accession number</b> |
|------------------------------|--------------------------|------------------------|-------------------------|
| SuppDataFile1                | 41C_A1_5'                | HS-6-MP_A1             | ERS571589               |
| SuppDataFile1                | 41C_B1_5'                | HS-7-MP_B1             | ERS571592               |
| SuppDataFile1                | 41C_C1_5'                | HS-8-MP_C1             | ERS571594               |
| SuppDataFile1                | 37C_Ctrl1_5'             | HS-10-MP_E1            | ERS571599               |
| SuppDataFile1                | 41C_A2_5'                | HS-11-MP_A2            | ERS571602               |
| SuppDataFile1                | 41C_B2_5'                | HS-12-MP_B2            | ERS571612               |
| SuppDataFile1                | 41C_C2_5'                | HS-13-MP_C2            | ERS571615               |
| SuppDataFile1                | 37C_Ctrl2_5'             | HS-14-MP_D2            | ERS571617               |
| SuppDataFile1                | 37C_Ctrl3_5'             | HS-15-MP_E2            | ERS571620               |
| SuppDataFile1                | 41C_A1_3'                | HS-6-MP_A1             | ERS571589               |
| SuppDataFile1                | 41C_B1_3'                | HS-7-MP_B1             | ERS571592               |
| SuppDataFile1                | 41C_C1_3'                | HS-8-MP_C1             | ERS571594               |
| SuppDataFile1                | 37C_Ctrl1_3'             | HS-10-MP_E1            | ERS571599               |
| SuppDataFile1                | 41C_A2_3'                | HS-11-MP_A2            | ERS571602               |
| SuppDataFile1                | 41C_B2_3'                | HS-12-MP_B2            | ERS571612               |
| SuppDataFile1                | 41C_C2_3'                | HS-13-MP_C2            | ERS571615               |
| SuppDataFile1                | 37C_Ctrl2_3'             | HS-14-MP_D2            | ERS571617               |
| SuppDataFile1                | 37C_Ctrl3_3'             | HS-15-MP_E2            | ERS571620               |
| SuppDataFile2                | 37C_T1_Ctrl              | LMPP_Ctrl_1            | ERS801326               |
| SuppDataFile2                | 37C_T1_Ctrl              | LMPP_Ctrl_2            | ERS801327               |
| SuppDataFile2                | 37C_T1_Ctrl              | LMPP_Ctrl_3            | ERS801328               |
| SuppDataFile2                | 37C_T1_Ctrl              | LMPP_Ctrl_4            | ERS801329               |
| SuppDataFile2                | 37C_T1_Ctrl              | LMPP_Ctrl_5            | ERS801330               |
| SuppDataFile2                | 37C_T1_Ctrl              | LMPP_Ctrl_6            | ERS801331               |
| SuppDataFile2                | 37C_T1_Ctrl              | LMPP_Ctrl_10           | ERS801335               |
| SuppDataFile2                | 37C_T1_Ctrl              | LMPP_Ctrl_11           | ERS801336               |
| SuppDataFile2                | 37C_T1_Ctrl              | LMPP_Ctrl_12           | ERS801337               |
| SuppDataFile2                | 37C_T1_Ctrl              | LMPP_Ctrl_13           | ERS801338               |
| SuppDataFile2                | 37C_T1_Ctrl              | LMPP_Ctrl_14           | ERS801339               |
| SuppDataFile2                | 37C_T1_Ctrl              | LMPP_Ctrl_15           | ERS801340               |
| SuppDataFile2                | 41C_HS_T1                | LMPP_HS_1              | ERS801342               |
| SuppDataFile2                | 41C_HS_T1                | LMPP_HS_2              | ERS801343               |
| SuppDataFile2                | 41C_HS_T1                | LMPP_HS_3              | ERS801344               |
| SuppDataFile2                | 41C_HS_T1                | LMPP_HS_4              | ERS801345               |
| SuppDataFile2                | 41C_HS_T1                | LMPP_HS_5              | ERS801346               |
| SuppDataFile2                | 41C_HS_T1                | LMPP_HS_6              | ERS801347               |
| SuppDataFile2                | 41C_HS_T1                | LMPP_HS_10             | ERS801351               |
| SuppDataFile2                | 41C_HS_T1                | LMPP_HS_11             | ERS801352               |
| SuppDataFile2                | 41C_HS_T1                | LMPP_HS_12             | ERS801353               |
| SuppDataFile2                | 41C_HS_T1                | LMPP_HS_13             | ERS801354               |
| SuppDataFile2                | 41C_HS_T1                | LMPP_HS_14             | ERS801355               |

|               |                           |                |            |
|---------------|---------------------------|----------------|------------|
| SuppDataFile2 | 41C_HS_T1                 | LMPP_HS_15     | ERS801356  |
| SuppDataFile2 | 37C_T2_3Cycle growth      | LMPP_Cycle6_1  | ERS801358  |
| SuppDataFile2 | 37C_T2_3Cycle growth      | LMPP_Cycle6_2  | ERS801359  |
| SuppDataFile2 | 37C_T2_3Cycle growth      | LMPP_Cycle6_3  | ERS801360  |
| SuppDataFile2 | 37C_T2_3Cycle growth      | LMPP_Cycle6_4  | ERS801361  |
| SuppDataFile2 | 37C_T2_3Cycle growth      | LMPP_Cycle6_5  | ERS801362  |
| SuppDataFile2 | 37C_T2_3Cycle growth      | LMPP_Cycle6_6  | ERS801363  |
| SuppDataFile2 | 37C_T2_3Cycle growth      | LMPP_Cycle6_10 | ERS801366  |
| SuppDataFile2 | 37C_T2_3Cycle growth      | LMPP_Cycle6_11 | ERS801367  |
| SuppDataFile2 | 37C_T2_3Cycle growth      | LMPP_Cycle6_12 | ERS801368  |
| SuppDataFile2 | 37C_T2_3Cycle growth      | LMPP_Cycle6_13 | ERS801369  |
| SuppDataFile2 | 37C_T2_3Cycle growth      | LMPP_Cycle6_14 | ERS801370  |
| SuppDataFile2 | 37C_T2_3Cycle growth      | LMPP_Cycle6_15 | ERS801371  |
| SuppDataFile4 | Control, T0, Biorep1      | T0_BioRep_1    | ERS3340779 |
| SuppDataFile4 | Control, T1, Biorep1      | T1_No drug_1   | ERS3340780 |
| SuppDataFile4 | DHA_IC10, Biorep1         | T1_DHA_IC10_1  | ERS3340781 |
| SuppDataFile4 | DHA_IC25, Biorep1         | T1_DHA_IC25_1  | ERS3340782 |
| SuppDataFile4 | AS_IC10, Biorep1          | T1_AS_IC10_1   | ERS3340784 |
| SuppDataFile4 | AS_IC25, Biorep1          | T1_AS_IC25_1   | ERS3340785 |
| SuppDataFile4 | Control, T0, Biorep2      | T0_BioRep_2    | ERS3340787 |
| SuppDataFile4 | Control, T1, Biorep2      | T1_No drug_2   | ERS3340788 |
| SuppDataFile4 | DHA_IC10, Biorep2         | T1_DHA_IC10_2  | ERS3340789 |
| SuppDataFile4 | DHA_IC25, Biorep2         | T1_DHA_IC25_2  | ERS3340790 |
| SuppDataFile4 | AS_IC10, Biorep2          | T1_AS_IC10_2   | ERS3340792 |
| SuppDataFile4 | AS_IC25, Biorep2          | T1_AS_IC25_2   | ERS3340793 |
| SuppDataFile4 | Control, T2, Biorep1      | T2_No drug_1   | ERS3340795 |
| SuppDataFile4 | BTZ_IC10, Biorep1         | T2_BTZ_IC10_1  | ERS3340802 |
| SuppDataFile4 | Control, T2, Biorep2      | T2_No drug_2   | ERS3340803 |
| SuppDataFile4 | BTZ_IC10, Biorep2         | T2_BTZ_IC10_2  | ERS3340810 |
| SuppDataFile4 | Oxi_T1 Untreated, biorep1 | T1_Untreated_1 | ERS3340829 |
| SuppDataFile4 | Oxi_T1 Treated, biorep1   | T1_Treated_1   | ERS3340830 |
| SuppDataFile4 | Oxi_T1 Untreated, biorep2 | T1_Untreated_2 | ERS3340831 |
| SuppDataFile4 | Oxi_T1 Treated, biorep2   | T1_Treated_2   | ERS3340832 |
| SuppDataFile4 | Oxi_T2 Untreated, biorep1 | T2_Untreated_1 | ERS3340833 |
| SuppDataFile4 | Oxi_T2 Treated, biorep1   | T2_Treated_1   | ERS3340834 |
| SuppDataFile4 | Oxi_T2 Untreated, biorep2 | T2_Untreated_2 | ERS3340835 |
| SuppDataFile4 | Oxi_T2 Treated, biorep2   | T2_Treated_2   | ERS3340852 |



## **SUPPLEMENTARY REFERENCES**

1. Lamarque M, *et al.* Food vacuole proteome of the malarial parasite *Plasmodium falciparum*. *Proteomics Clin Appl* **2**, 1361-1374 (2008).
2. Ismail HM, *et al.* Artemisinin activity-based probes identify multiple molecular targets within the asexual stage of the malaria parasites *Plasmodium falciparum* 3D7. *Proceedings of the National Academy of Sciences* **113**, 2080-2085 (2016).
3. Gnädig NF, *et al.* Insights into the intracellular localization, protein associations and artemisinin resistance properties of *Plasmodium falciparum* K13. *PLoS Pathog* **16**, e1008482 (2020).
4. Bridgford JL, *et al.* Artemisinin kills malaria parasites by damaging proteins and inhibiting the proteasome. *Nature Communications* **9**, 3801 (2018).
5. Zhang M, *et al.* Uncovering the essential genes of the human malaria parasite *Plasmodium falciparum* by saturation mutagenesis. *Science* **360**, (2018).
